# Supplementary material for: Fluid-mediated, brittle-ductile deformation at seismogenic depth: Part II – Stress history and fluid pressure variations in a shear zone in a nuclear waste repository (Olkiluoto Island, Finland)
Source: Copernicus journal article supplement (doi:10.5194/se-2019-142), 2019-09-26
Supplement: Supplementary file 1 [file Supplement1.docx]

Supplementary Figures:

­
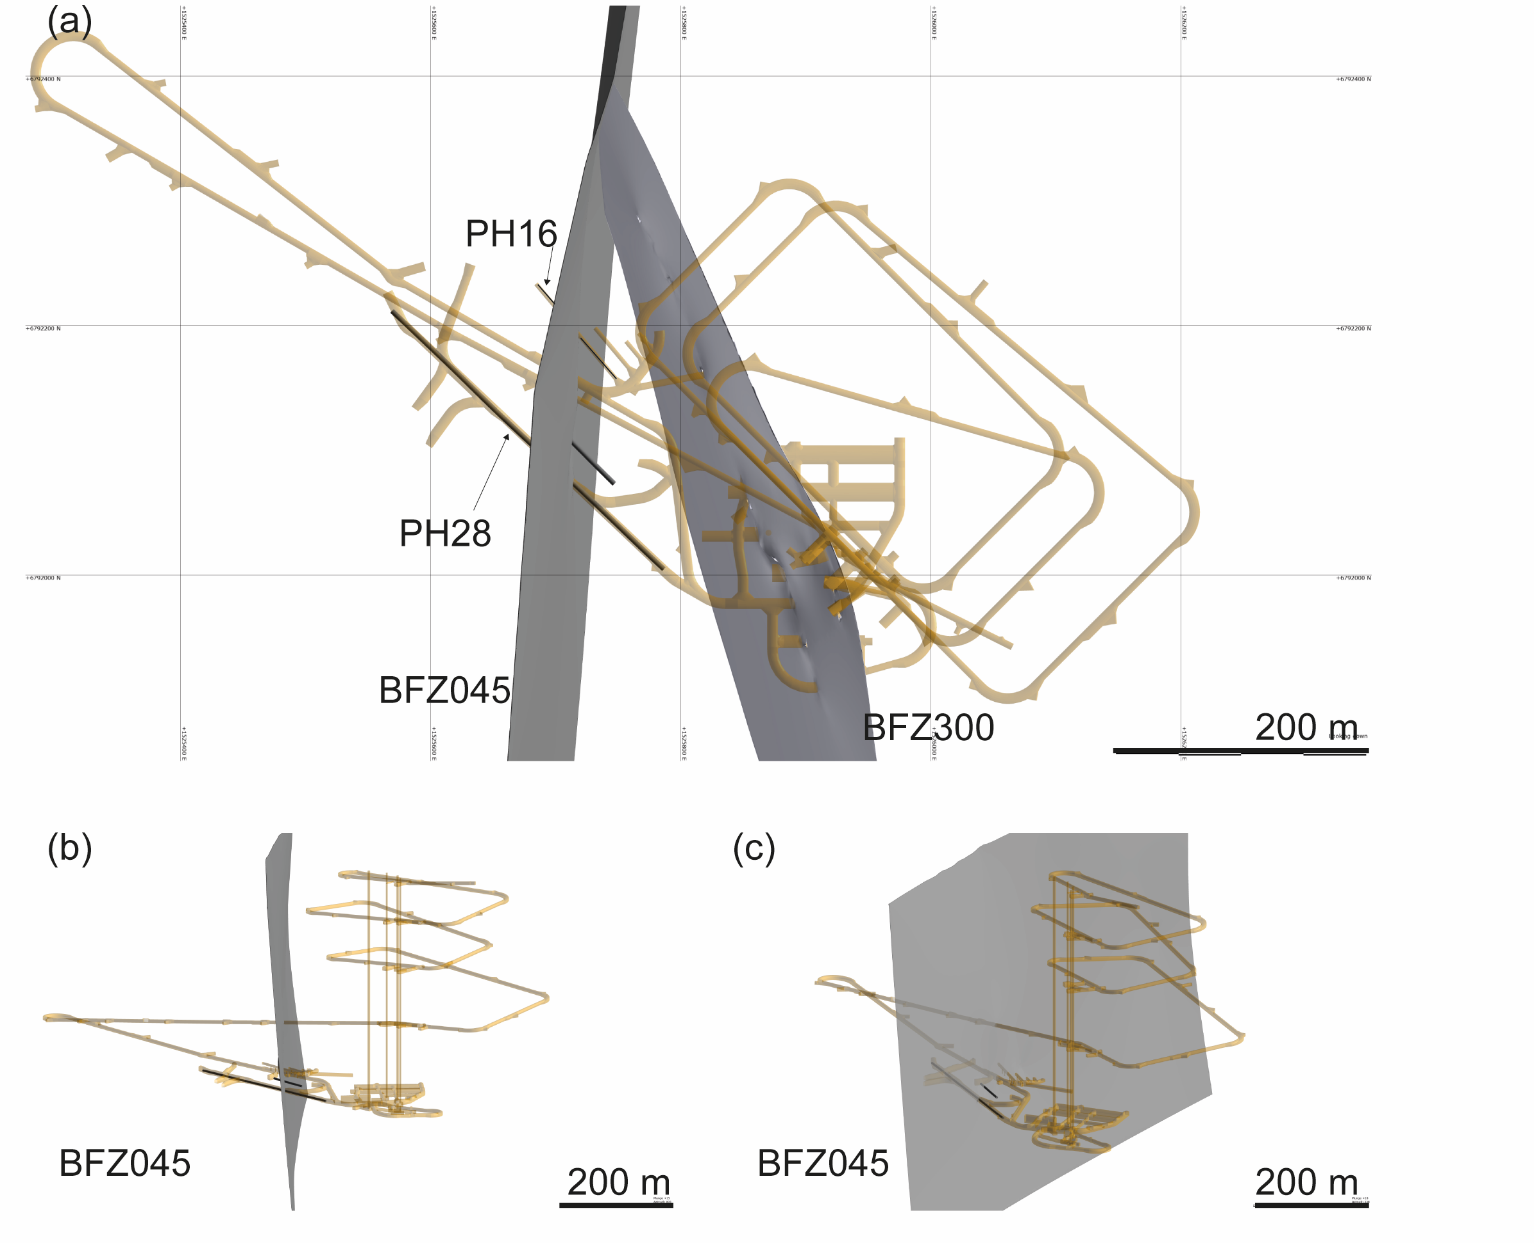


Figure S: 3D model of BFZ045 and BFZ300 intersecting the underground facilities of Onkalo, courtesy of Posiva. a) Top view of conjugate fault set. Black lines indicate the drill core (PH16, PH28) orientations. b) View to the North of BfZ045 and c) viwew to the NW of BFZ045 modelled fault plane.
