# Supplementary material for: Fluid-mediated, brittle-ductile deformation at seismogenic depth: Part II – Stress history and fluid pressure variations in a shear zone in a nuclear waste repository (Olkiluoto Island, Finland)
Source: Copernicus journal article supplement (doi:10.5194/se-2019-142), 2019-09-26
Supplement: Supplementary file 2 [file Supplement2.xlsx]

## Sheet: Muscovites
EMPA wt% muscovite
SiO2		47.85	47.73	48.28	47.15	47.69	48.08	47.93	47.7	48.05	47.74	48.32	47.74	48.29	47.64	47.75	48.25	47.59	48.21	47.88	47.94	47.77	48.26	47.88	47.98	47.71	48.41	47.44	48.17	48.38	48.91	47.8	48.23	48.34	48.29	48.22	47.74	47.44	48.1	47.69	47.77	47.97	47.69	47.74	48.27	48.13	47.3	47.91	47.16
TiO2		0.0857	0.0858	0.0931	0.0531	0.0843	0.0975	0.1182	0.065	0.0872	0.0444	0.0873	0.1375	0.1183	0.0709	0.1138	0.1329	0.0532	0.124	0.0533	0.0739	0.0814	0.0517	0.0606	0.1079	0.0444	0.0991	0.0251	0.0725	0.1167	0.0975	0.0872	0.0207	0.0636	0.1212	0.0103	0.0163	0.0871	0.068	0.0488	0.0488	0.1152	0.0385	0.1211	0.0547	0.0148	0.0369	0.0399	0.0192
Al2O3		33.61	34.14	33.91	34.21	34.57	33.9	33.74	34.63	33.95	34.77	34.81	34.44	34.02	33.46	33.99	33.53	34.03	33.86	33.91	34.4	35.24	34.74	34.06	33.82	35.23	34.52	34.29	33.59	33.41	33.18	34.4	34.14	33.87	33.74	33.95	34.16	33.52	34.9	34.76	35.02	34.5	34.41	34.68	34.18	33.74	33.45	34.38	34.75
Cr2O3		0.0136	0.0195	0.0105	0.0026	0.0169	0	0	0.0315	0.0348	0	0.0064	0.0105	0.0055	0	0	0.0038	0	0	0.0159	0	0.0487	0.0665	0	0	0.0003	0.0166	0.027	0.0103	0	0.0108	0	0.0754	0.0019	0	0.0353	0	0.0496	0.0169	0.0184	0	0.0074	0.0115	0	0	0	0.0443	0.0005	0.0429
Fe2O3		0	0	0	0	0	0	0	0	0	0	0	0	0	0	0	0	0	0	0	0	0	0	0	0	0	0	0	0	0	0	0	0	0	0	0	0	0	0	0	0	0	0	0	0	0	0	0	0
FeO		2.56	2.06	2.54	2.6	2.12	2.43	2.47	2.46	2.4	2.09	1.88	2.17	1.95	2.84	2.36	2.42	2.34	2.71	2.19	2.06	1.78	2.16	2.27	2.2	1.79	2.08	2.56	2.18	2.24	2.61	2.22	2.33	2.3	2.2	2.02	2.44	2.36	1.97	2.18	2.07	2.13	2.13	2.45	2.42	2.18	2.37	1.94	2.25
MnO		0	0.0558	0.0604	0.0474	0	0.0008	0.0536	0.0229	0.0474	0.0306	0.0138	0	0.0375	0.029	0.0145	0.0359	0.0115	0.0519	0.013	0.0123	0	0.0313	0.0038	0	0.0153	0	0	0.0046	0.0229	0.0428	0	0.0696	0.0634	0.013	0.049	0.0023	0.0084	0	0.0421	0.016	0	0.0061	0.0306	0	0.0123	0.0168	0.039	0.0527
MgO		1.4808	1.4738	1.5629	1.5494	1.372	1.3833	1.4552	1.4087	1.3682	1.2923	1.3417	1.3478	1.3372	1.6569	1.4077	1.6262	1.5404	1.446	1.2215	1.2933	1.105	1.4585	1.4417	1.3604	1.1677	1.4109	1.4384	1.419	1.5261	1.84	1.4868	1.4884	1.5642	1.4743	1.4507	1.6125	1.5199	1.2889	1.4703	1.4179	1.2986	1.3619	1.4743	1.4707	1.4755	1.4299	1.394	1.3678
CaO		0.0251	0.0084	0.0167	0	0	0.005	0.0126	0.0284	0.0366	0.0413	0.0265	0.0035	0.0093	0.0096	0.0086	0.0262	0.0234	0	0.7666	0.0379	0.0225	0.0293	0.0055	0.0372	0.0162	0.0324	0	0.0098	0.025	0.0012	0.075	0.0143	0.0361	0.0332	0	0	0.0077	0	0.0157	0.0043	0.0105	0.0167	0.0088	0.0969	0.051	0.0141	0	0.0347
Na2O		0.1301	0.0879	0.0912	0.1144	0.1514	0.1364	0.0969	0.165	0.1428	0.1789	0.1428	0.1221	0.0973	0.1352	0.1309	0.1465	0.1161	0.1321	0.1519	0.1582	0.1512	0.1053	0.1255	0.141	0.1169	0.1628	0.1394	0.0967	0.088	0.0905	0.1638	0.1368	0.126	0.1262	0.1273	0.2109	0.145	0.1155	0.149	0.1112	0.1532	0.1263	0.1018	0.1204	0.1555	0.148	0.1352	0.1391
K2O		11.11	11.13	11.08	11.22	11.22	11.12	11.19	11.11	10.89	10.99	11.08	11.04	11.2	11.09	11.13	10.88	11.12	11.09	10.99	11.02	10.97	11.08	11.17	11.14	11.11	11.18	10.97	11.11	11.03	11.11	10.9	11.06	10.98	11.04	11.18	11.01	10.96	11.17	11.23	11.11	11.02	11.01	11.01	10.64	10.94	11.13	11.14	10.85
NiO		0	0.0246	0	0.0333	0	0.0356	0	0	0	0.0035	0	0	0.0143	0.0436	0	0.058	0	0.0058	0	0.0153	0.008	0.0115	0	0	0	0	0	0	0.0359	0	0	0	0	0	0.0311	0	0.0771	0	0.0338	0.0434	0.04	0	0	0.0437	0	0.0033	0.0104	0
Total		96.8653	96.8158	97.6449	96.9803	97.2246	97.1887	97.0666	97.6216	97.0071	97.1811	97.7086	97.0115	97.0795	96.9753	96.9056	97.1096	96.8247	97.6299	97.1923	97.011	97.1768	97.9942	97.0172	96.7866	97.2009	97.9119	96.89	96.663	96.8746	97.8928	97.1329	97.5653	97.3453	97.038	97.0738	97.1921	96.1749	97.6294	97.6381	97.6117	97.245	96.8011	97.6167	97.2965	96.6992	95.9434	96.9891	96.6665
Formula for 11 O
SiO2		3.15462	3.14112	3.15481	3.11165	3.12696	3.15577	3.15309	3.11932	3.15548	3.12684	3.14255	3.13381	3.16519	3.14438	3.14369	3.16647	3.13629	3.154	3.14531	3.14451	3.12167	3.13544	3.14685	3.1592	3.11947	3.14756	3.12503	3.17331	3.18016	3.18774	3.1333	3.15109	3.1627	3.16829	3.16311	3.13389	3.14785	3.13399	3.11647	3.11637	3.13993	3.13631	3.11887	3.15478	3.16746	3.14892	3.14373	3.10838
TiO2		0.00425052	0.00424793	0.00457671	0.00263633	0.00415834	0.00481441	0.00584982	0.0031978	0.0043081	0.00218778	0.00427137	0.00679032	0.00583342	0.00352052	0.00563645	0.00656145	0.0026376	0.006103	0.00263411	0.00364666	0.00400178	0.00252697	0.00299634	0.00534484	0.002184	0.00484741	0.00124388	0.00359312	0.00577099	0.00478065	0.00430019	0.00101744	0.00313044	0.00598228	0.000508302	0.000804981	0.00434795	0.00333318	0.00239912	0.00239503	0.00567283	0.0019048	0.00595191	0.00268953	0.000732747	0.00184809	0.00196965	0.000952047
Al2O3		2.61149	2.64796	2.61149	2.66083	2.67147	2.62238	2.61594	2.669	2.62765	2.684	2.66818	2.66445	2.62803	2.60282	2.63738	2.59338	2.64312	2.61076	2.62538	2.6593	2.71408	2.66009	2.63828	2.62449	2.71481	2.64524	2.66215	2.60796	2.5883	2.54869	2.65759	2.62882	2.61168	2.60896	2.62472	2.64286	2.62137	2.67999	2.67714	2.69256	2.66149	2.66705	2.67023	2.63281	2.61695	2.62453	2.65877	2.69941
Cr2O3		0.000708886	0.00101461	0.000542462	0.000135661	0.000876103	0	0	0.00162864	0.00180686	0	0.000329086	0.000544945	0.000285022	0	0	0.000197167	0	0	0.00082581	0	0.00251614	0.00341591	0	0	1.55084e-05	0.000853337	0.0014062	0.000536472	0	0.000556522	0	0.00389482	9.82828e-05	0	0.00183078	0	0.0026021	0.000870588	0.000950664	0	0.000382962	0.000597947	0	0	0	0.00233173	2.59396e-05	0.00223558
Fe2O3		0	0	0	0	0	0	0	0	0	0	0	0	0	0	0	0	0	0	0	0	0	0	0	0	0	0	0	0	0	0	0	0	0	0	0	0	0	0	0	0	0	0	0	0	0	0	0	0
FeO		0.141147	0.113378	0.138806	0.1435	0.116252	0.133388	0.135892	0.134538	0.131811	0.114482	0.102254	0.119129	0.106892	0.156765	0.129941	0.132819	0.128969	0.148273	0.120316	0.113003	0.0972792	0.117364	0.124772	0.121146	0.0978799	0.113102	0.141032	0.120105	0.12314	0.142264	0.121701	0.127311	0.125848	0.120714	0.110817	0.133955	0.130963	0.107346	0.119141	0.112936	0.1166	0.117149	0.13386	0.132274	0.119983	0.131952	0.106461	0.124025
MnO		0	0.00311038	0.00334295	0.00264956	0	4.44751e-05	0.00298662	0.00126842	0.00263656	0.00169758	0.000760188	0	0.0020819	0.00162124	0.000808576	0.00199553	0.000641925	0.00287593	0.000723334	0.000683353	0	0.00172243	0.000211539	0	0.000847324	0	0	0.000256673	0.00127498	0.00236274	0	0.00385157	0.00351339	0.000722432	0.00272251	0.000127884	0.0004721	0	0.00233026	0.000884097	0	0.000339788	0.00169326	0	0.000685625	0.000947318	0.00216756	0.0029421
MgO		0.145536	0.144591	0.152247	0.152434	0.13411	0.135353	0.142712	0.137332	0.133947	0.126182	0.130083	0.131894	0.130662	0.163031	0.138162	0.159097	0.151337	0.141028	0.119623	0.126463	0.107648	0.141263	0.141256	0.133535	0.113819	0.136756	0.141254	0.139357	0.149547	0.178778	0.145291	0.144968	0.152565	0.1442	0.141865	0.157802	0.150347	0.125194	0.143236	0.137895	0.126717	0.13352	0.143586	0.143294	0.144759	0.141911	0.136362	0.134398
CaO		0.00177301	0.000592307	0.00116922	0	0	0.00035163	0.000888123	0.00198991	0.0025753	0.00289833	0.00184661	0.000246168	0.000653129	0.000678905	0.000606651	0.00184227	0.00165231	0	0.0539576	0.00266359	0.00157539	0.00203964	0.000387309	0.00262442	0.00113491	0.00225714	0	0.00069173	0.00176075	8.37994e-05	0.00526756	0.00100104	0.00253065	0.00233389	0	0	0.000547437	0	0.00109928	0.000300564	0.0007364	0.00117675	0.000615987	0.00678563	0.00359617	0.00100576	0	0.00245055
Na2O		0.0166298	0.0112157	0.0115544	0.0146379	0.0192471	0.017358	0.0123594	0.0209204	0.0181821	0.0227184	0.0180065	0.01554	0.0123651	0.0173015	0.016709	0.0186406	0.0148346	0.0167561	0.0193469	0.0201189	0.019157	0.0132643	0.0159922	0.0180003	0.0148194	0.0205229	0.017804	0.0123511	0.0112153	0.0114361	0.0208177	0.017329	0.0159833	0.0160536	0.0161905	0.0268425	0.0186544	0.0145908	0.0188785	0.0140651	0.0194426	0.0161042	0.0128946	0.0152568	0.0198413	0.0191032	0.0172005	0.0177759
K2O		0.934405	0.934426	0.92364	0.944622	0.938522	0.931113	0.939107	0.926856	0.912341	0.918284	0.919289	0.924519	0.936518	0.933795	0.934799	0.910884	0.934892	0.925578	0.921009	0.92213	0.914523	0.918349	0.93655	0.935746	0.926707	0.927337	0.921876	0.933699	0.924942	0.923754	0.911501	0.921838	0.916451	0.924045	0.935591	0.92203	0.927761	0.928458	0.936207	0.924622	0.920213	0.92371	0.917611	0.887136	0.918479	0.945261	0.932527	0.912318
NiO		0	0.00130234	0	0.00176787	0	0.0018797	0	0	0	0.000184411	0	0	0.000754005	0.00231498	0	0.00306198	0	0.000305246	0	0.000807313	0.000420551	0.000601044	0	0	0	0	0	0	0.00189834	0	0	0	0	0	0.00164114	0	0.00411547	0	0.00177684	0.00227761	0.00210623	0	0	0.00229758	0	0.00017673	0.000548971	0
H2O		0	0	0	0	0	0	0	0	0	0	0	0	0	0	0	0	0	0	0	0	0	0	0	0	0	0	0	0	0	0	0	0	0	0	0	0	0	0	0	0	0	0	0	0	0	0	0	0
		7.01055	7.00296	7.00219	7.03486	7.01159	7.00246	7.00882	7.01605	6.99074	6.99947	6.98757	6.99693	6.98926	7.02623	7.00773	6.99495	7.01438	7.00568	7.00913	6.99332	6.98287	6.99608	7.00729	7.00009	6.99169	6.99847	7.01179	6.99187	6.988	7.00045	6.99977	7.00112	6.9945	6.9913	6.999	7.01831	7.00903	6.99377	7.01963	7.0043	6.99329	6.99787	7.00531	6.97732	6.99249	7.01799	6.99976	7.00489
Position		PH28_7a-1	PH28_7a-2	PH28_7a-3	PH28_7a-4	PH28_7a-5	PH28_7b-1	PH28_7b-2	PH28_7b-3	PH28_7b-4	PH28_7b-5	PH28_5a-1	PH28_5a-2	PH28_5a-3	PH28_5a-4	PH28_5a-5	PH28_5a-6	PH28_5a-7	PH28_5a-8	PH28_5a-9	PH28_5a-10	PH28_5a-11	PH28_5a-12	PH28_5a-13	PH28_5a-14	PH28_5a-15	PH28_5b-1	PH28_5b-2	PH28_5b-3	PH28_5b-4	PH28_5b-5	PH28_5b-6	PH28_5b-7	PH28_5b-8	PH28_5b-9	PH28_5b-10	PH28_5b-11	PH28_5b-12	PH28_5b-13	PH28_5b-15	PH28_5b-16	PH28_5b-17	PH28_5b-19	PH28_5b-20	PH28_5c-1	PH28_5c-2	PH28_5c-3	PH28_5c-4	PH28_5c-5
[truncated: 38 more columns]

## Sheet: Chlorite
EMPA wt% chlorite
	Mylonite																							Cataclasite																								Veins
	Chemical composition (wt%)
	PH16_2_1	PH16_2_2	PH16_2_3	PH16_2_4	PH16_2_5	PH16_2_6	PH16_2_7	PH16_2_8	PH16_2_9	PH28_10-1	PH28_10-3	PH28_10-4	PH28_10-5	PH28_10-6	PH28_10-7	PH28_10-8	PH28_10-9	PH28_10-10	PH28_10-11	PH28_10-12	PH28_10-13	PH28_10-14	PH28_10-15		PH28_9_1	PH28_9_2	PH28_9_3	PH28_9_4	PH28_9_5	PH28_9_6	PH28_9_7	PH28_9_8	PH28_9_9	PH28_9_10	PH28_9_11	PH28_9_12	PH28_9_13	PH28_9_14	PH28_9_15	PH28_9_16	PH28_9_17	PH28_9_18	PH28_9_19	PH28_9_20	PH28_9_21	PH28_9_22	PH28_9_23		PH28_6-1
SiO2	25.77	25.04	25.08	25.24	25.82	25.86	24.77	25.66	28	25.83	24.79	24.75	24.21	24.55	24.53	24.5	24.72	24.86	24.72	25.25	25.27	25.24	24.79		23.51	23.65	23	23.68	23.6	23.42	23.8	23.13	23.78	23.29	23.95	23.97	25.31	23.48	23.36	23.71	24.37	23.29	24.17	23.52	23.97	24.6	24.56		24.43
TiO2	0	0.0344	0.0522	0.0384	0.0343	0.0673	0.0274	0.0795	0	0.0808	0.0784	0.0784	0.0027	0.0432	0.0135	0	0	0.0662	0.061	0.0501	0.0258	0.0299	0.0595		0.0579	0.0377	0.0523	0.0862	0.0309	0.0363	0.1153	0.0685	0.1021	0.0495	0.0712	0.0741	0.0082	0.043	0.1211	0.0336	0.0377	0.0041	0.0095	0.0858	0.0994	0.0417	0.0445		0.0566
Al2O3	22.26	21.6	22.2	22.08	22.29	21.75	21.46	21.41	21.17	21.75	21.89	21.76	21.64	21.96	21.73	22.06	22.08	22.28	22.43	22.14	22.14	22.4	22.14		23.26	22.77	23.6	22.32	22.15	22.69	22.42	21.99	22.7	22.44	21.38	22	21.37	22.04	22.38	22.96	21.82	22.85	21.99	23.16	23.51	22.88	20.68		21.88
FeO	29.49	28.7	28.79	30.42	29.93	29.62	29.33	29.75	30.04	29.85	35.83	35.33	35.56	35.7	35.53	34.69	34.16	35.18	33.87	34.09	34.8	33.67	34.6		37.03	37.4	39.14	36.57	38.53	37.3	39.65	37.83	38.1	39.15	37.95	37.36	30.53	38.6	37.35	38.48	36.8	37.53	34.36	36.43	36.86	36.56	37.36		36.57
MnO	0.3404	0.1728	0.2251	0.2904	0.3491	0.2599	0.2904	0.2611	0.2996	0.4804	0.9178	0.8758	0.8718	0.9824	0.9405	0.7887	0.8558	0.9257	0.8215	0.8618	0.761	0.7995	0.8578		1.1117	0.9956	0.7346	1.0826	0.8455	0.91	0.81	0.7766	0.6879	0.7927	0.7906	0.6809	0.5501	0.7778	1.0738	0.7908	1.1403	0.9048	0.6754	1.056	0.8483	0.9412	1.0413		0.9811
MgO	12.63	12.01	12.17	11.21	11.74	12.44	11.37	12.2	12.26	12.19	7.57	7.75	8.02	7.52	7.61	8.26	8.32	7.58	8.52	7.72	8.02	8.24	8.43		5.82	5.04	3.94	5.71	4.81	5.44	3.78	4.73	3.97	3.9	4.86	5.59	10.68	4.41	5.43	4.75	5.72	5.3	7.73	5.71	5.81	5.92	6.53		6.72
CaO	0.029	0.0474	0.0339	0.0767	0.0613	0.0206	0.1203	0.0285	0.058	0.0197	0.1207	0.1675	0.1205	0.094	0.0472	0.0501	0.0374	0.1539	0.1278	0.1218	0.0935	0.0864	0.0557		0.0016	0.0116	0.0193	0.0194	0.0084	0.0109	0.0014	0.0152	0.0534	0.0034	0.0082	0.0011	0.0159	0.0111	0.0424	0.02	0	0.0299	0	0.0152	0.0339	0.0122	0.0227		0.0537
Na2O	0.0177	0.0136	0	0.0556	0.0546	0.015	0.0594	0.0105	0.0583	0.0487	0.0103	0.0256	0.0766	0.0436	0.0485	0	0.0256	0.0477	0.0235	0.0496	0.0247	0.0269	0		0	0.0326	0.0214	0.0429	0	0.0252	0.0458	0	0.0766	0.0361	0.0913	0.0241	0.0258	0	0	0	0	0.0188	0.0108	0.0166	0	0.0328	0.0092		0.0226
K2O	0.0345	0.0639	0.0438	0.0616	0.0469	0.0461	0.0844	0.0176	0.0246	0.0246	0.0195	0	0.0028	0.0008	0	0.0037	0.0212	0.0133	0.0167	0.084	0.0237	0.0748	0.0399		0.0404	0.0371	0	0.0228	0.0213	0.0233	0	0.005	0	0.0799	0	0.0095	0.001	0.0283	0.011	0.0547	0.0235	0.0294	0.0869	0.1012	0.0552	0.1732	0		0.0115
	90.5918	87.7025	88.697	89.5132	90.3643	90.0814	87.5584	89.4668	91.9878	90.3344	91.2357	90.8052	90.5475	90.9138	90.5384	90.4106	90.2261	91.2296	90.603	90.3814	91.2422	90.5676	90.973		90.8317	90.0134	90.5077	89.534	90.0494	89.8558	90.6549	88.6402	89.4701	89.7417	89.1254	89.7098	88.5262	89.4039	89.7795	90.7991	89.9116	89.9571	89.0327	90.0949	91.1928	91.2046	90.2626		90.7317
	Structural formulae on the basis of 14 O
Si	2.6771	2.6865	2.6589	2.6734	2.6952	2.7043	2.6774	2.7078	2.8556	2.7005	2.6578	2.6614	2.6203	2.6429	2.6515	2.6366	2.6569	2.6558	2.6401	2.7044	2.6875	2.689	2.6468		2.5546	2.5998	2.534	2.6096	2.6098	2.579	2.6242	2.5965	2.6351	2.5952	2.67	2.6397	2.717	2.6183	2.5797	2.5923	2.6727	2.5653	2.641	2.5708	2.5827	2.6469	2.6935		2.6482
Ti	0	0.0028	0.0042	0.0031	0.0027	0.0053	0.0022	0.0063	0	0.0064	0.0063	0.0063	0.0002	0.0035	0.0011	0	0	0.0053	0.0049	0.004	0.0021	0.0024	0.0048		0.0047	0.0031	0.0043	0.0071	0.0026	0.003	0.0096	0.0058	0.0085	0.0041	0.006	0.0061	0.0007	0.0036	0.0101	0.0028	0.0031	0.0003	0.0008	0.0071	0.0081	0.0034	0.0037		0.0046
Al	2.7254	2.7312	2.7739	2.7563	2.7422	2.6806	2.7338	2.6628	2.5446	2.6801	2.766	2.7577	2.7603	2.7863	2.7683	2.7978	2.797	2.8052	2.8232	2.7948	2.775	2.8126	2.786		2.9788	2.9499	3.0645	2.899	2.8869	2.9449	2.9134	2.9092	2.9647	2.9469	2.8091	2.8554	2.7037	2.8966	2.9129	2.9586	2.8203	2.9663	2.8319	2.9836	2.9854	2.9014	2.6729		2.7953
Fe(3+)	0	0	0	0	0	0	0	0	0	0	0	0	0	0	0	0	0	0	0	0	0	0	0		0	0	0	0	0	0	0	0	0	0	0	0	0	0	0	0	0	0	0	0	0	0	0		0
Fe(2+)	2.562	2.5751	2.5526	2.6945	2.6128	2.5904	2.6513	2.6254	2.5621	2.6099	3.2125	3.1771	3.2186	3.2141	3.2118	3.122	3.0705	3.143	3.0251	3.0535	3.0951	2.9998	3.0894		3.365	3.4382	3.6063	3.3704	3.5633	3.4351	3.6561	3.5514	3.5308	3.6483	3.5381	3.4407	2.7408	3.5997	3.4495	3.5184	3.3752	3.457	3.1398	3.3301	3.3213	3.2897	3.4265		3.3152
Mn	0.03	0.0157	0.0202	0.0261	0.0309	0.023	0.0266	0.0233	0.0259	0.0425	0.0833	0.0798	0.0799	0.0896	0.0861	0.0719	0.0779	0.0838	0.0743	0.0782	0.0685	0.0721	0.0776		0.1023	0.0927	0.0686	0.1011	0.0792	0.0849	0.0756	0.0738	0.0646	0.0748	0.0747	0.0635	0.05	0.0735	0.1004	0.0732	0.1059	0.0844	0.0625	0.0978	0.0774	0.0858	0.0967		0.0901
Mg	1.956	1.9209	1.9234	1.77	1.8269	1.9393	1.8321	1.9192	1.864	1.8999	1.2099	1.2423	1.294	1.2069	1.2263	1.3251	1.3331	1.2072	1.3565	1.2326	1.2715	1.3087	1.3418		0.9428	0.8259	0.6471	0.9381	0.793	0.8931	0.6213	0.7915	0.6558	0.6478	0.8077	0.9177	1.7092	0.7331	0.8939	0.7742	0.9352	0.8703	1.2592	0.9304	0.9332	0.9496	1.0676		1.0859
Ca	0.0032	0.0054	0.0039	0.0087	0.0069	0.0023	0.0139	0.0032	0.0063	0.0022	0.0139	0.0193	0.014	0.0108	0.0055	0.0058	0.0043	0.0176	0.0146	0.014	0.0107	0.0099	0.0064		0.0002	0.0014	0.0023	0.0023	0.001	0.0013	0.0002	0.0018	0.0063	0.0004	0.001	0.0001	0.0018	0.0013	0.005	0.0023	0	0.0035	0	0.0018	0.0039	0.0014	0.0027		0.0062
Na	0.0036	0.0028	0	0.0114	0.0111	0.003	0.0124	0.0021	0.0115	0.0099	0.0021	0.0053	0.0161	0.0091	0.0102	0	0.0053	0.0099	0.0049	0.0103	0.0051	0.0056	0		0	0.0069	0.0046	0.0092	0	0.0054	0.0098	0	0.0165	0.0078	0.0197	0.0051	0.0054	0	0	0	0	0.004	0.0023	0.0035	0	0.0068	0.002		0.0047
K	0.0046	0.0087	0.0059	0.0083	0.0062	0.0062	0.0116	0.0024	0.0032	0.0033	0.0027	0	0.0004	0.0001	0	0.0005	0.0029	0.0018	0.0023	0.0115	0.0032	0.0102	0.0054		0.0056	0.0052	0	0.0032	0.003	0.0033	0	0.0007	0	0.0114	0	0.0013	0.0001	0.004	0.0015	0.0076	0.0033	0.0041	0.0121	0.0141	0.0076	0.0238	0		0.0016
[truncated: 13 more columns]
